# Supplementary material for: Crystal engineering of zinc(II) metal–organic frameworks: role of steric bulk and angular disposition of coordinating sites of the ligands
Source: Royal Society of Chemistry journal article supplement (doi:10.1039/b800908b), 2008-01-01
Supplement: b800908b.pdf [file b800908b.pdf]

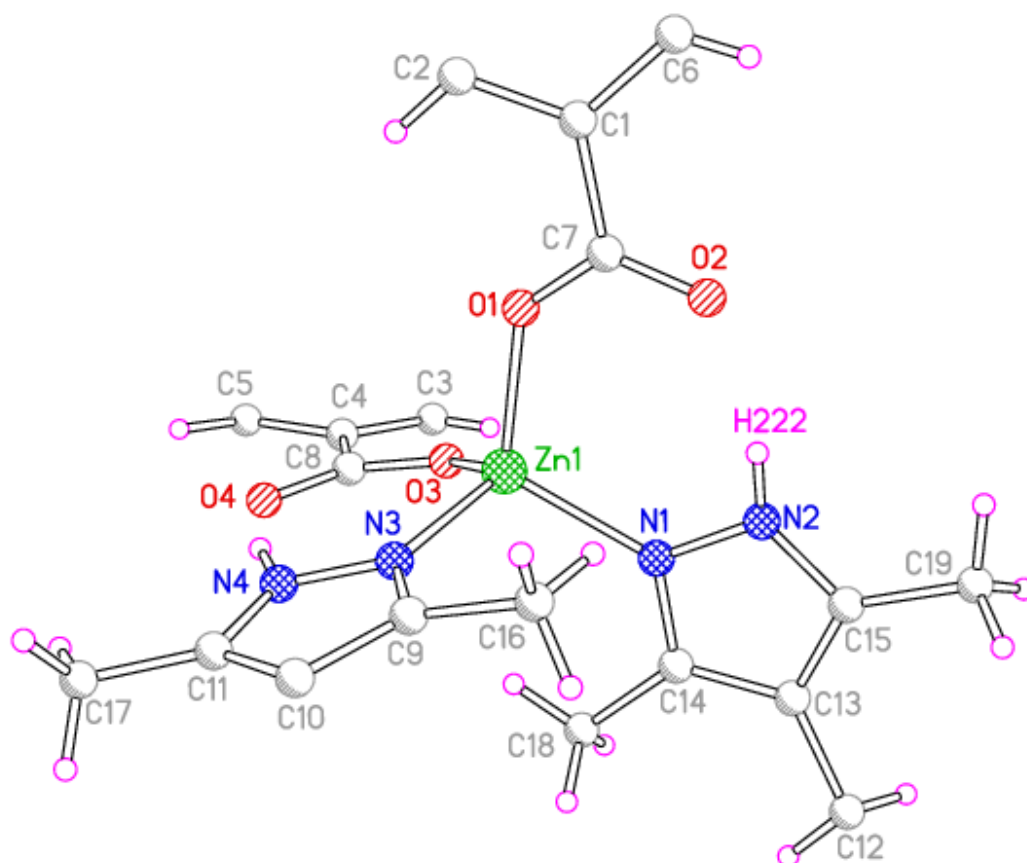

**Figure SI-1.** Asymmetric unit of **1**.

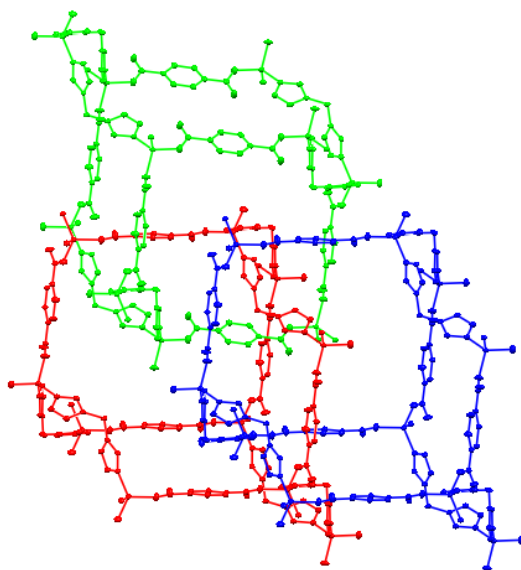

**Figure SI-2.** Crystal packing of **1** showing a three fold interpenetrated diamondoid network.

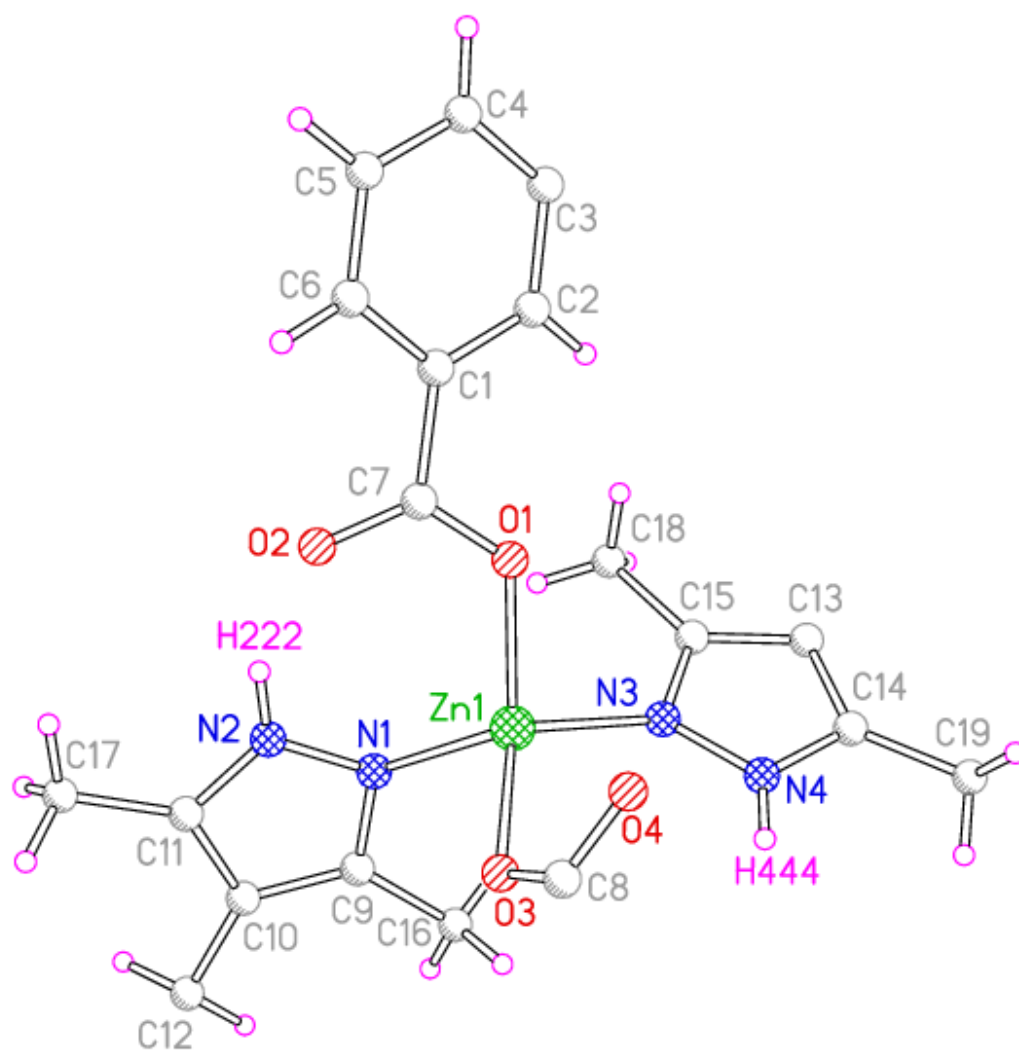

**Figure SI-3.** Asymmetric unit of **2**.

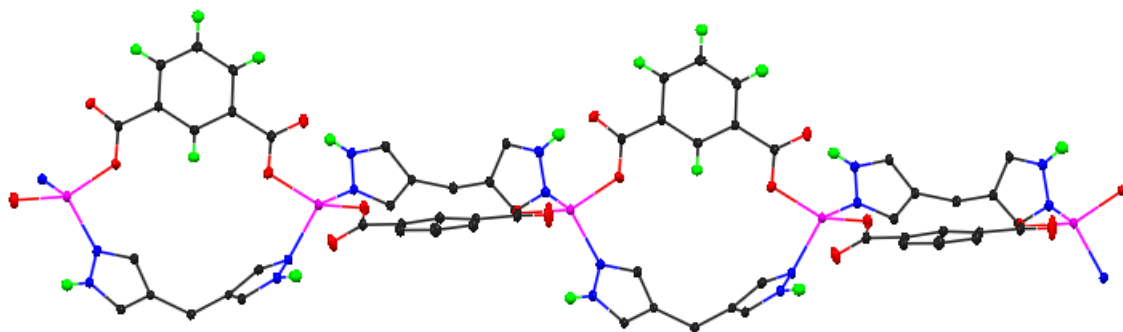

**Figure SI-4.** Crystal packing of **2** showing helical arrangement of organic molecules.

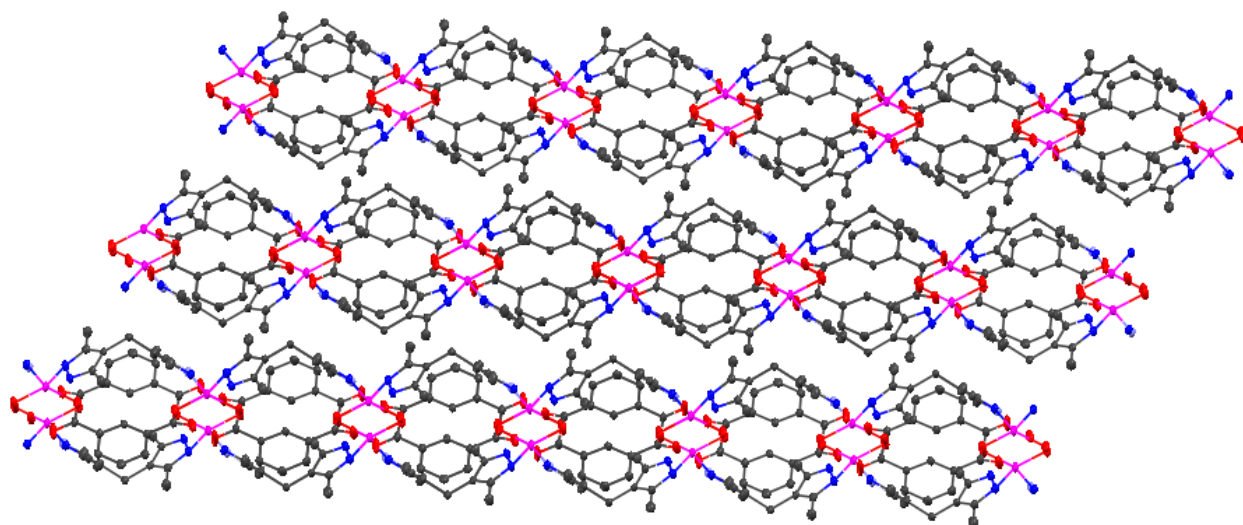

**Figure SI-5.** Crystal packing of **2** showing supramolecular 1D aggregation.

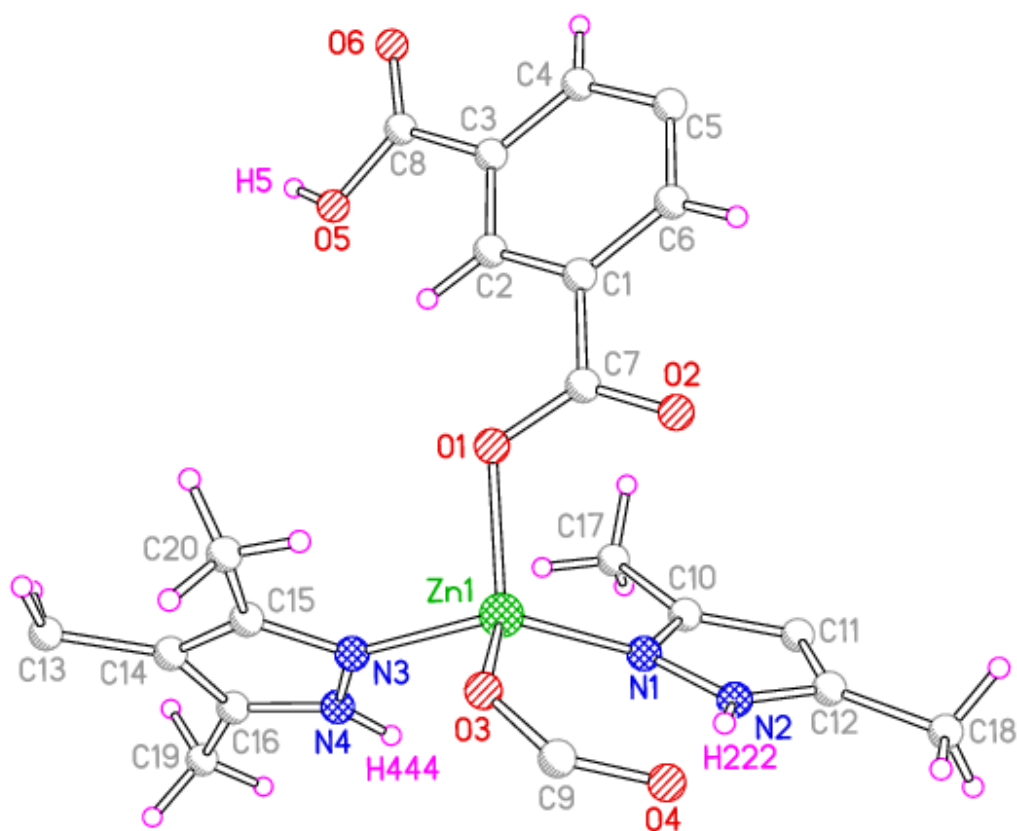

Figure SI-6. Asymmetric unit of **3**.

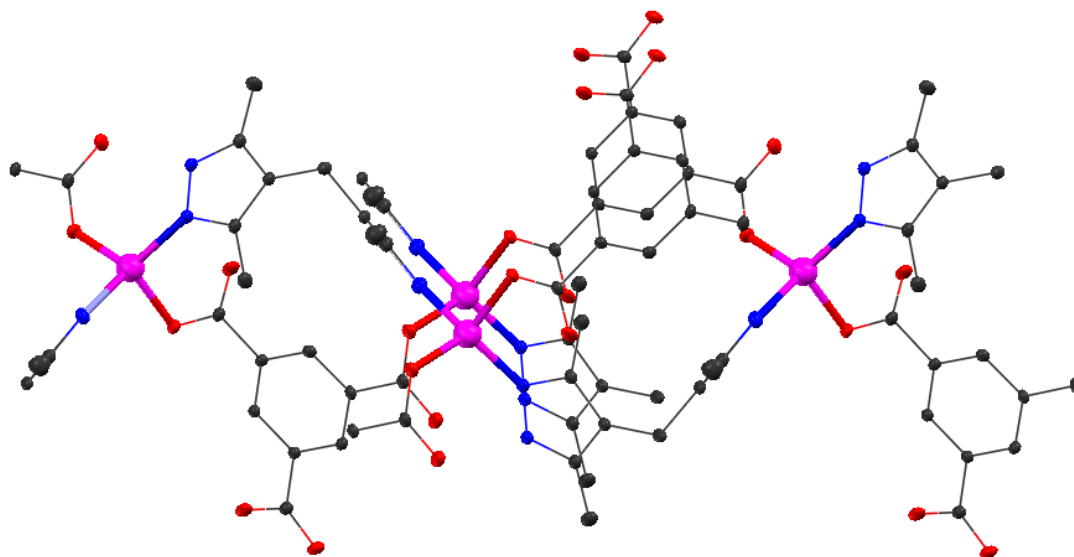

**Figure SI-7.** Crystal packing of **3** showing the (4,4) grid along the *a* axis.

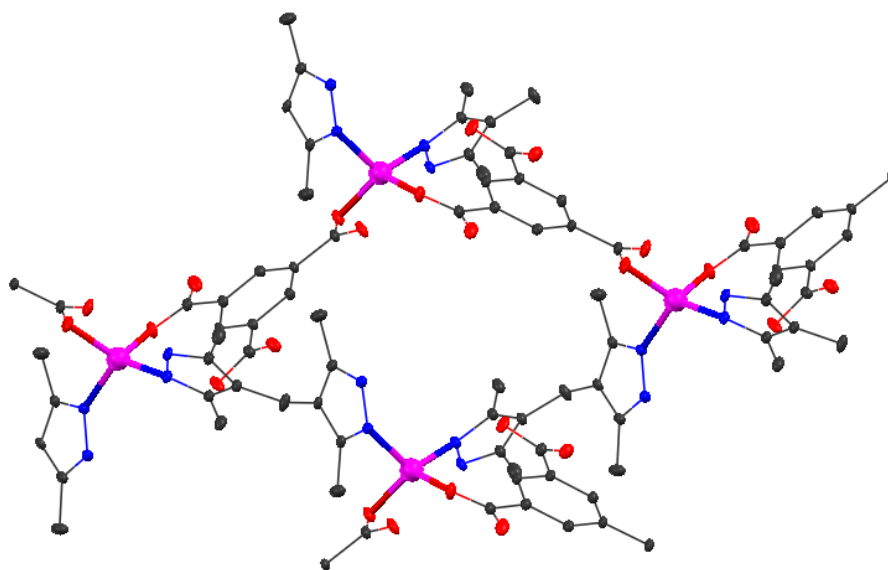

**Figure SI-8.** Crystal packing of **3** showing the (4,4) grid along the *c* axis.
